# Supplementary material
Source: HighWire-hosted journal article supplement (https://cmaj.ca/highwire/filestream/149299/field_highwire_adjunct_files/5/230128-guide-6-at.pdf)
Supplement: 230128-guide-6-at.pdf [file 230128-guide-6-at.pdf]

## Appendix 6: Recommendation Feedback Surveys

### Table of Contents

|                                                                                 |          |
|---------------------------------------------------------------------------------|----------|
| <i>Naloxone Guidance Development Group - Recommendation Feedback Surveys ..</i> | <i>2</i> |
| <i>Recommendation Feedback Survey Response Rates.....</i>                       | <i>4</i> |
| <i>Public Input - Recommendation Feedback Surveys.....</i>                      | <i>5</i> |

## Naloxone Guidance Development Group - Recommendation Feedback Surveys

1. **What is your name?**
  2. **What committee are you on? *If you need a reminder, look at the original email where you were provided a link to this survey.***
  3. **We completed a systematic review for the research question:** [research question]
  4. **Based on the available literature, our recommendation is:** [recommendation]
  5. **The sources we based this recommendation on from the systematic review include:** [list of relevant sources]
  6. For a summary of the evidence, see the PDF below.
  7. **Strength of recommendation:** We categorized the recommendation on [recommendation subject] as [conditional or strong] because of:
    - Balance of desirable and undesirable consequences:** [details]
    - Quality of evidence:** [details]
    - Values and preferences of those affected:** [details]
    - Resource use:** [details]
- To find out more about the GRADE framework click [here](#) for a detailed description or [here](#) for a brief overview.
- For a summary of the evidence that the strength of recommendation was based on, click on the PDF below.
8. **If you do think we should change the content of the recommendation, how should we change it?** Please specify “none” if you don’t think we should change the recommendation.

9. **If you do think we should change the wording of the recommendation, how should we change it?** Please specify “none” if you don’t think we should change the recommendation.

10. **Do you think this recommendation should be graded as 'strong' or 'conditional'?**

Strong recommendation: A strong recommendation implies that most or all individuals will be best served by the recommended course of action.

Conditional recommendation: A conditional rating implies that the recommendation depends on values, resources available or setting.

11. **If you do not agree with the strength of the recommendation, why not?**

12. **Are there other potential desirable or undesirable consequences that we did not consider?**

13. **Are there any factors related to values and preferences of those affected that we did not consider?**

14. **Are there any factors related to resource use that we did not consider?**

15. **Are there any other factors that we did not consider that would impact the strength of the recommendation?**

**If you receive honoraria, please let me know how long it took you to complete the survey.**

**Thank you for providing input on recommendations for the Take-Home Naloxone Guidance development project.**

## Recommendation Feedback Survey Response Rates

|                             | Number of Naloxone Guideline Development Group Members Who Provided Feedback | Response Rate |
|-----------------------------|------------------------------------------------------------------------------|---------------|
| Overdose Response           | 21/24                                                                        | 88%           |
| Overdose Response Follow Up | 22/24                                                                        | 92%           |
| Kit Contents                | 23/25                                                                        | 92%           |
| Route of Administration     | 22/25                                                                        | 88%           |

*Table 3: Response rates for recommendation feedback surveys*

## Public Input - Recommendation Feedback Surveys

Thank you for providing feedback on the Canadian Take-Home Naloxone Program Guidance. During the next 6 weeks between August 1st, 2022-September 30, 2022 we are asking for input on the final report. Please read the report and give us your feedback below.

1. We are hoping to hear from people living in Canada since our guidance was developed specifically for the Canadian context. Do you live in Canada? [Yes/No]
2. If you don't live in Canada, could you please tell us why you wish to participate (for example: do you work or spend much of your time in Canada)?

Please click the link below for a copy of the Guidance. [pdf link]

3. Do you have any feedback on the recommendations?
4. Is there any information that we did not consider when developing these recommendations?
5. Are there any barriers that people and programs might face to following these recommendations that we have not considered?
6. Do you have any feedback on the report (for example: the language we use or how we present information)?
7. Do you think these recommendations will have a positive impact? Why?
8. Do you think these recommendations will have a negative impact? Why?
9. Do you have any other comments?

If you wish to enter a draw for one of two \$100 Visa card, please click here or on the link below and enter your email. Your responses to this survey will not be associated with your email address. [survey link]
